# Supplementary material
Source: PubMed Central journal article supplement (PMC5938116)
Supplement: NIHMS925596-supplement-supplement_1.pdf [file NIHMS925596-supplement-supplement_1.pdf]

## SUPPORTING INFORMATION

**Figure S1.** Sequence alignment of the *Waxy* genomic sequence in *Nipponbare*, 9522 and XS134. The sequence of *Waxy* gene in 9522 is the same with that in XS134, which contain the typical  $Wx^b$  allele. Compared with *Nipponbare*, 9522 and XS134 contains 18 CT repeats in the CT-microsatellite regions, while *Nipponbare* contains 17 CT repeats. Two SNPs between 9522/XS134 and *Nipponbare* are indicated in red box. Start code and stop code are indicated in pink box.

**Figure S2.** Plant height, grain number per panicle, panicle number per plant and yield per plot in CRISPR-*waxy* mutants and their corresponding WT plants

(A) Plant height of *waxy*-9522, *waxy*-XS134 mutant and corresponding 9522, XS134 WT. (B) Grain number per panicle of *waxy*-9522, *waxy*-XS134 mutant and corresponding 9522, XS134 WT. (C) Panicle number per plant of *waxy*-9522, *waxy*-XS134 mutant and corresponding 9522, XS134 WT. (D) Yield per plot of *waxy*-9522, *waxy*-XS134 mutant and corresponding 9522, XS134 WT. Data are presented as means  $\pm$ sd. n=20 in A-C and n=3 in D; two-tailed, two-sample Student t-test. NS, no significant

**Figure S3.** Grain width, length and 1,000 grains weight of CRISPR-*waxy* mutants and their corresponding WTs

(A) and (C) Grain width of *waxy*-9522 mutant and corresponding 9522 WT. (B) and (D) Grain length of *waxy*-9522 mutant and corresponding 9522 WT. (E) 1,000 grains weight of *waxy*-9522 mutant and corresponding 9522 WT. (F) and (H) Grain width of *waxy*-XS134 mutant and corresponding XS134 WT. (G) and (I) Grain length of *waxy*-XS134 mutant and corresponding XS134 WT. (J) 1,000 grains weight of *waxy*-XS134 mutant and corresponding XS134 WT. Data are presented as means  $\pm$ sd. n= 50 in C, D, H and I; n=5 in E and J; two-tailed, two-sample Student t-test. NS: no significant

**Figure S4.** Detection of transgene DNA in CRISPR-*waxy* lines in 9522 and XS134 backgrounds. Red arrows indicate the transgene-free lines.

**Table S1.** Percentage of T0 plants with mutations in the target locus

\*, the T0 homozygous mutations were further confirmed in the T1 generation.

**Table S2.** Mutation analysis of putative sgRNA off-target sites

Mismatching bases are shown in red color; the PAM motif (NGG) is shown in blue color.

**Table S3.** Amylose content (AC), gel consistency (GC) and gelatinization temperature (GT) in mature seeds of *waxy* mutants and corresponding WT lines

mm, millimetres; ASV, alkali spreading value. Data are presented as means  $\pm$  sd. \*\*P < 0.01.

**Table S4.** Production of transgene-free homozygous lines in CRISPR-*waxy* mutants

**Table S5.** Primers used in this study
